# Supplementary material for: Spanish Validation for Olfactory Function Testing Using the Sniffin’ Sticks Olfactory Test: Threshold, Discrimination, and Identification
Source: PubMed Central journal article supplement (PMC7762307; doi:10.3390/brainsci10120943), 2020-12-07
Supplement: brainsci-10-00943-s001.pdf [file brainsci-10-00943-s001.pdf]

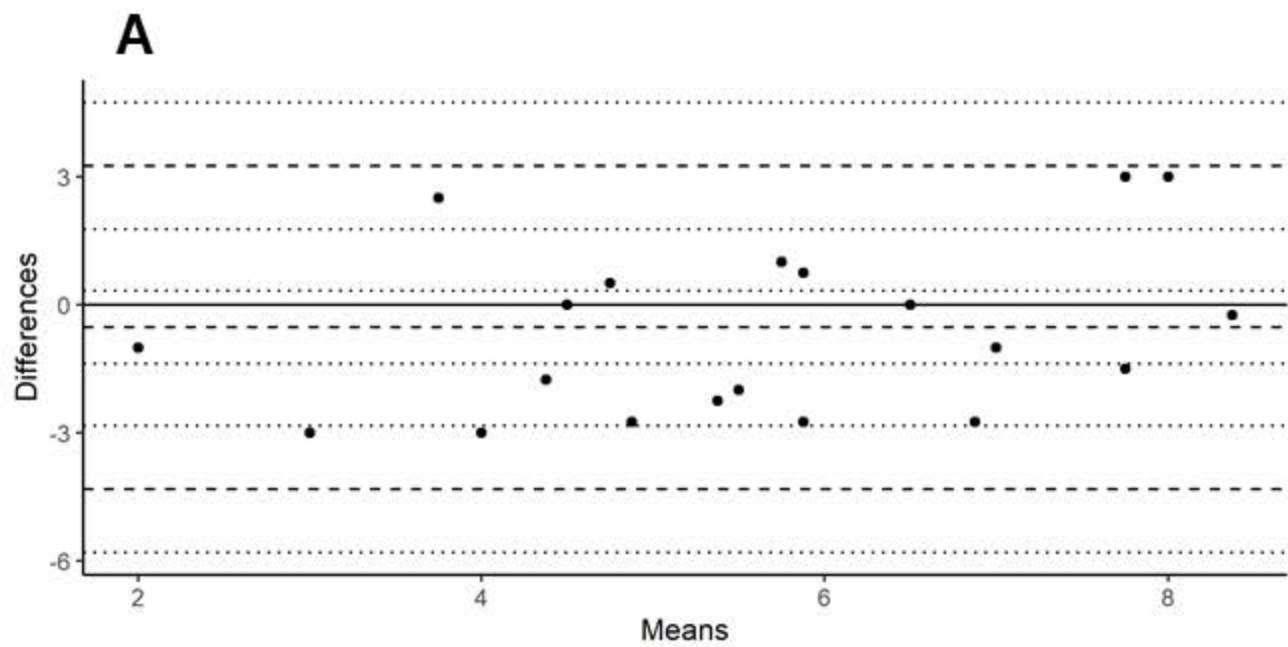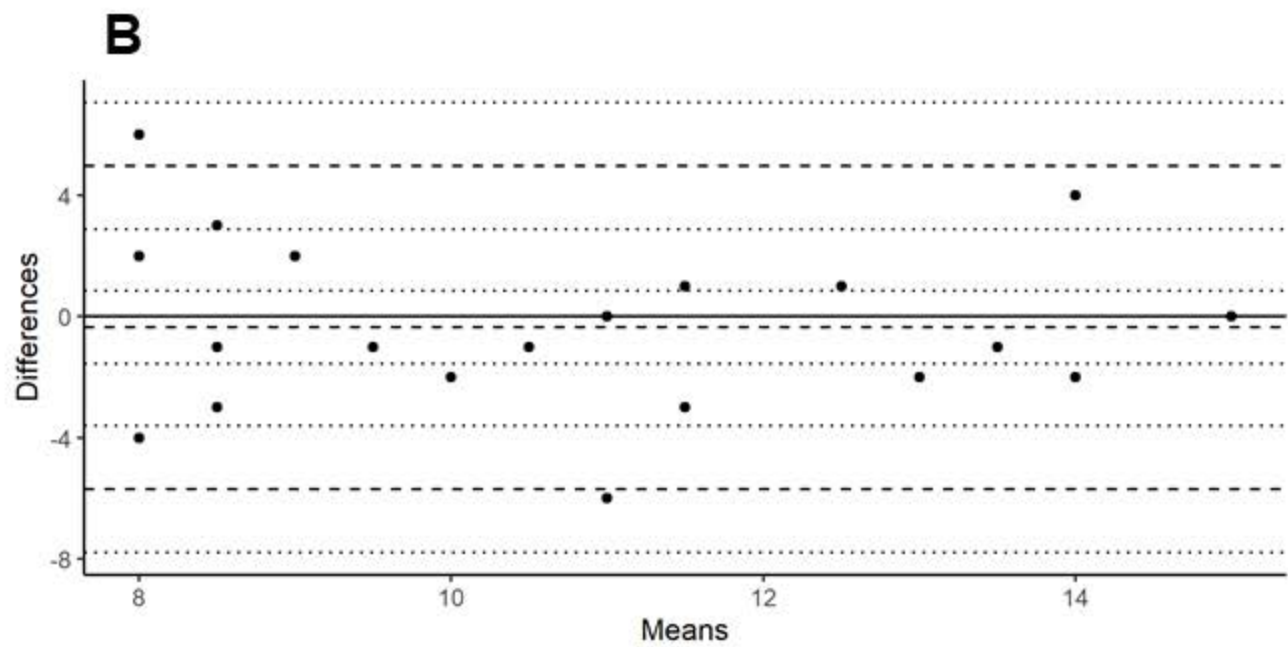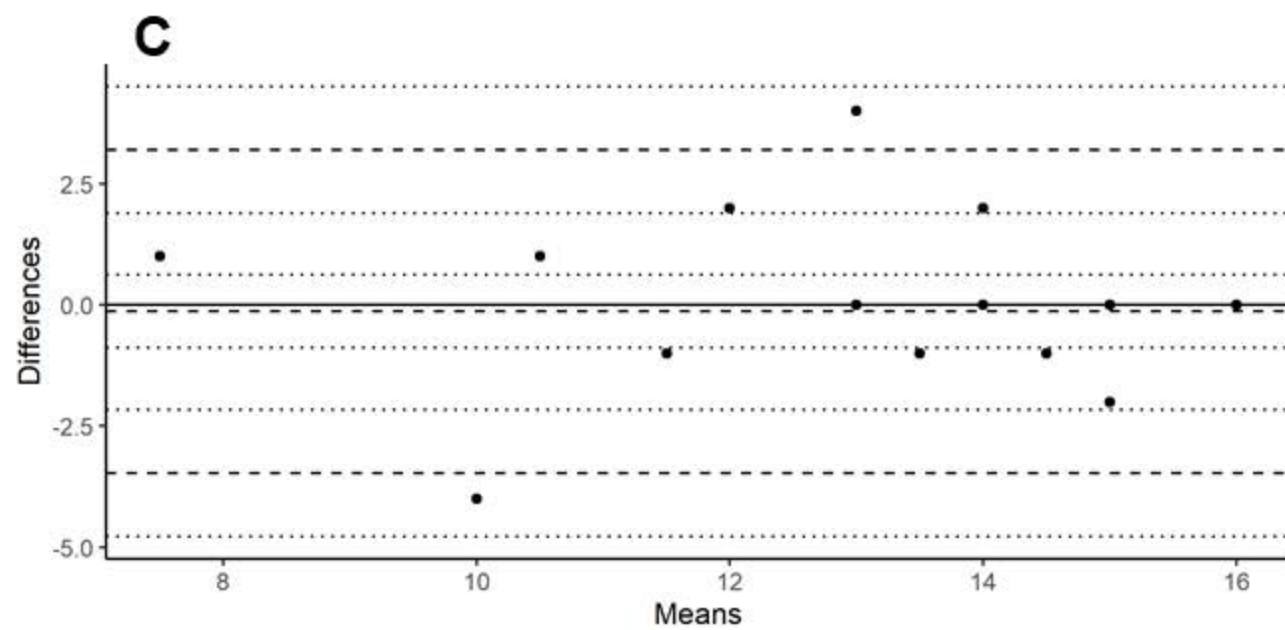

**Supplementary Figure S1.** Bland-Altman plots for olfactory subtests. A) Olfactory Threshold (OT). B) Olfactory Discrimination (OD). C) Olfactory Identification (OI).
